# Supplementary material for: Enhanced thermal stability of Cu–silylphosphido complexes via NHC ligation
Source: Royal Society of Chemistry journal article supplement (doi:10.1039/c5dt02040a), 2015-01-01
Supplement: c5dt02040a1.pdf [file c5dt02040a1.pdf]

## Supplementary Information

### Enhanced Thermal Stability of Cu-Silylphosphido Complexes via NHC Ligation

Bahareh Khalili Najafabadi<sup>a</sup> and John F. Corrigan<sup>\*a,b</sup>

<sup>a</sup> Department of Chemistry, The University of Western Ontario, London, Ontario, N6A 5B7 Canada.

<sup>b</sup> Centre for Advanced Materials and Biomaterials Research, The University of Western Ontario, London, Ontario, N6A 3K7 CANADA. E-mail: corrigan@uwo.ca.

Sample homogeneity of  $[\text{Cu}_6\{\text{P}(\text{SiMe}_3)_2\}_6]$  (**1**) and  $[\text{Ag}_6\{\text{P}(\text{SiMe}_3)_2\}_6]$  (**2**) can be confirmed via powder X-ray diffraction data. Data collection was done at low temperature of crystals that were crushed and ground in a minimum amount of Paratone oil to minimize their decomposition. Simulated patterns from the single crystal data and experimentally obtained PXRDs are presented below.

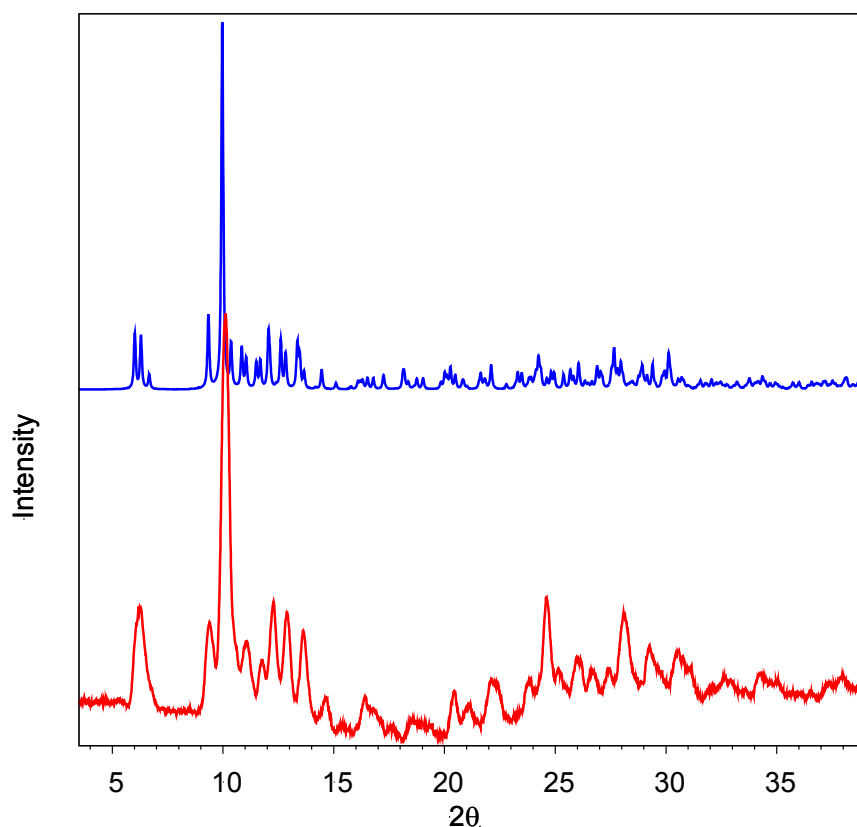

Figure S 1 Simulated (top) and experimentally obtained (bottom) powder X-ray diffraction of  $[\text{Ag}_6\{\text{P}(\text{SiMe}_3)_2\}_6]$ .

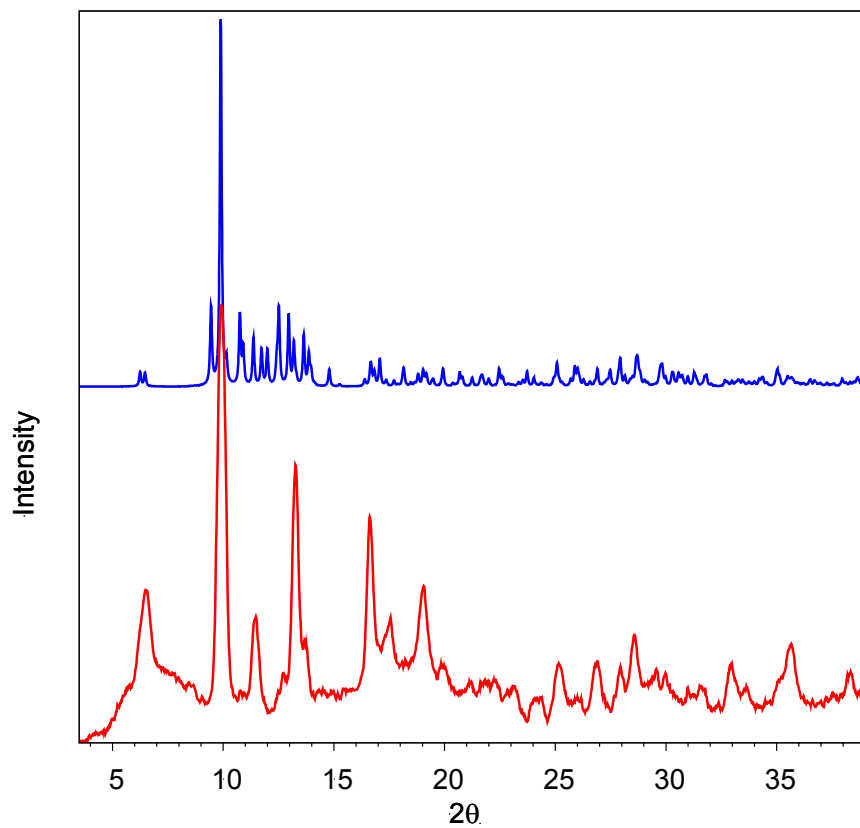

Figure S 2 Simulated (top) and experimentally obtained (bottom) powder X-ray diffraction of  $[\text{Cu}_6\{\text{P}(\text{SiMe}_3)_2\}_6]$ .

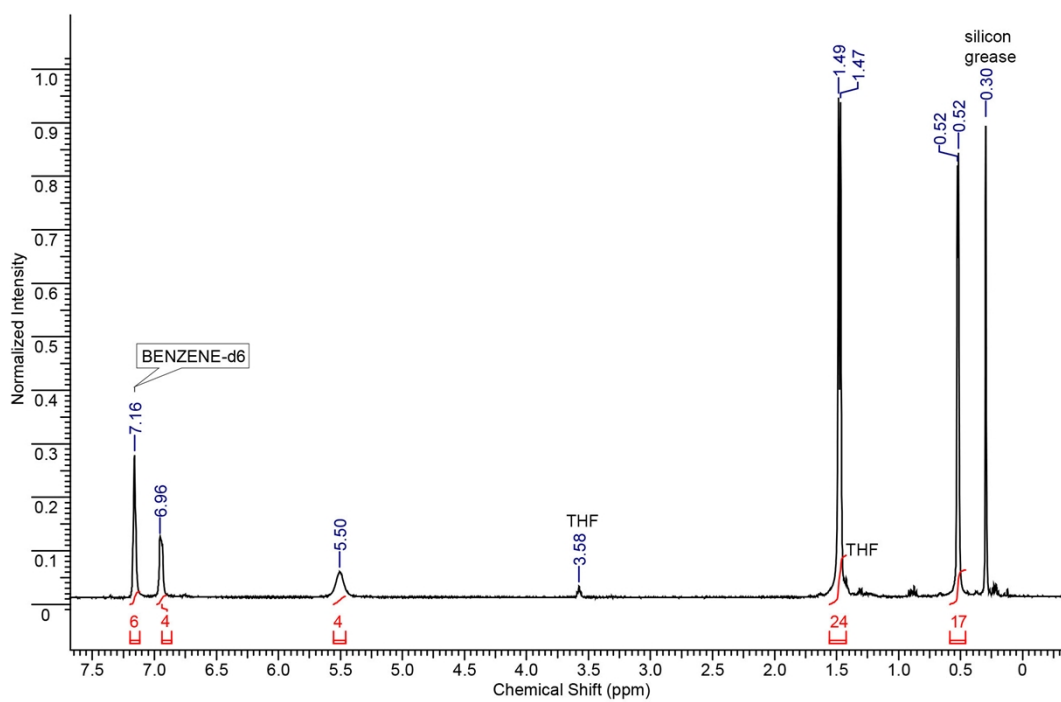

Figure S 3  $^1\text{H}$  NMR spectrum of **3**.

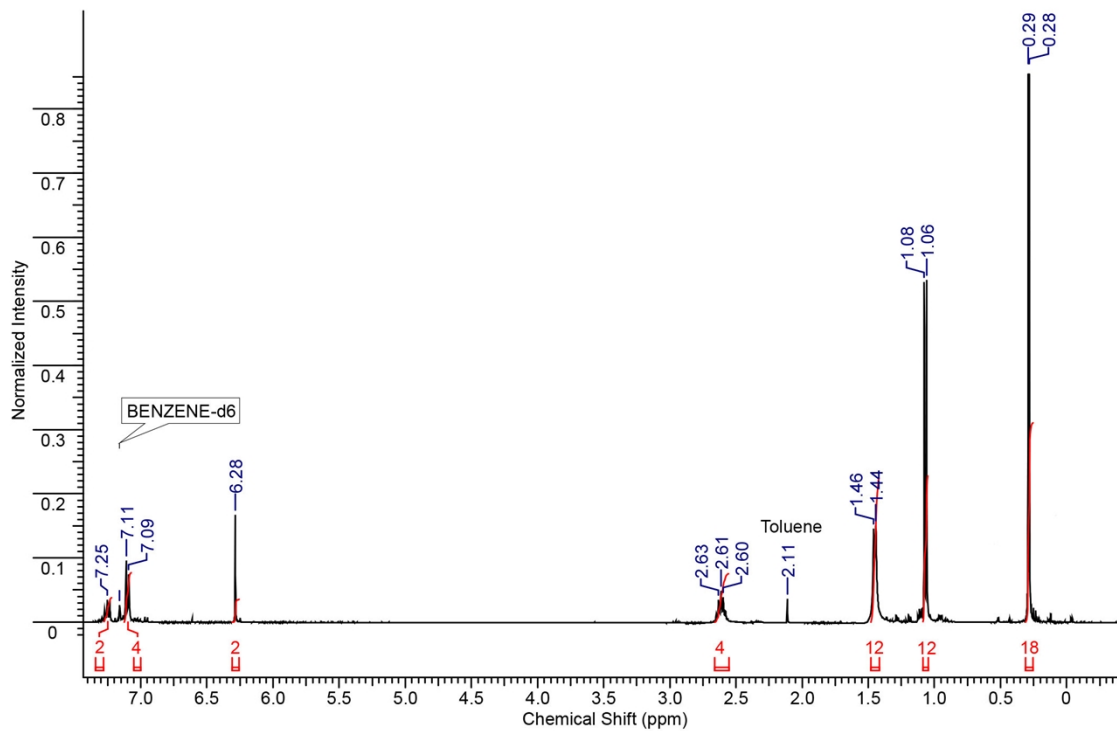

Figure S 4  $^1\text{H}$  NMR spectrum of 4.

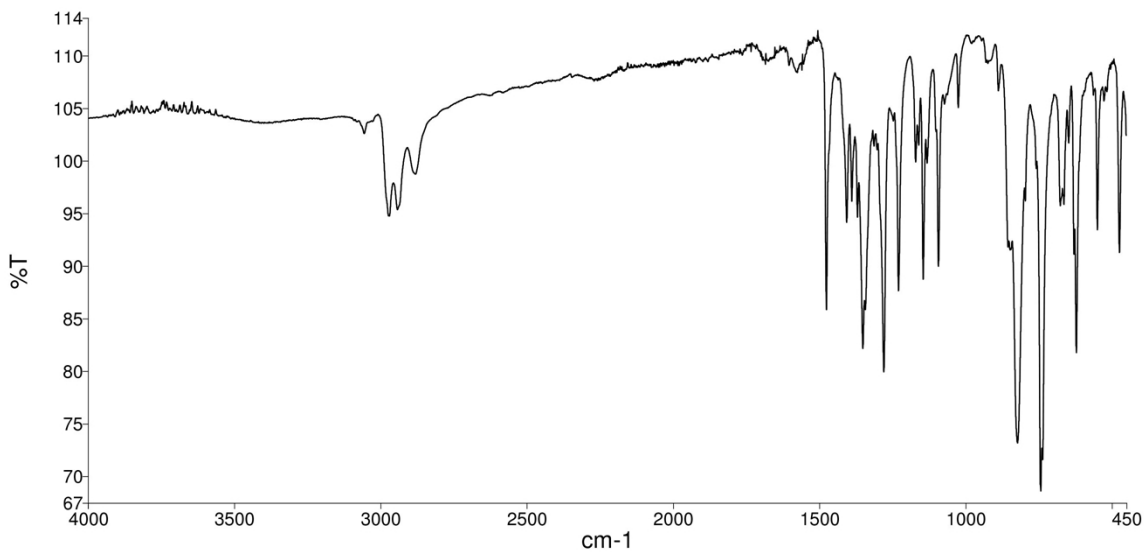

Figure S 5 IR spectrum of 3.

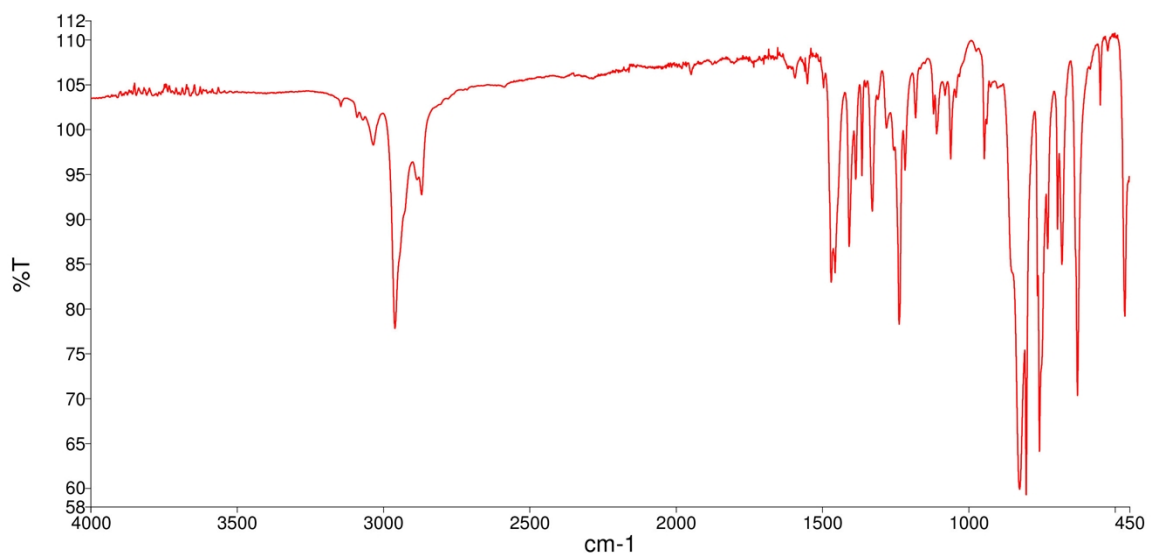

Figure S 6 IR spectrum of 4.
